# Supplementary figures and images for: A tactile sensor translating texture and sliding motion information into electrical pulses
Source: Royal Society of Chemistry journal article supplement (doi:10.1039/c5nr01509j), 2015-01-01

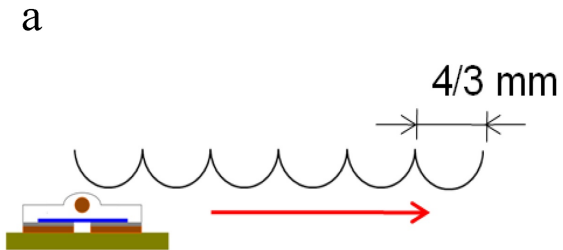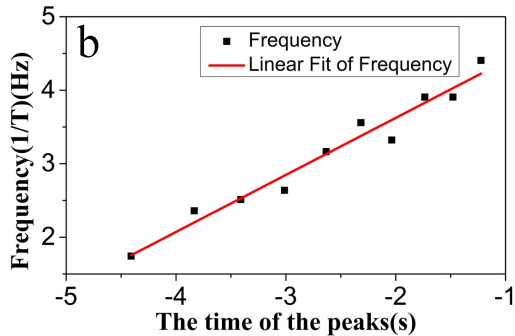

Supplement: c5nr01509j2.pdf [file c5nr01509j2.pdf]

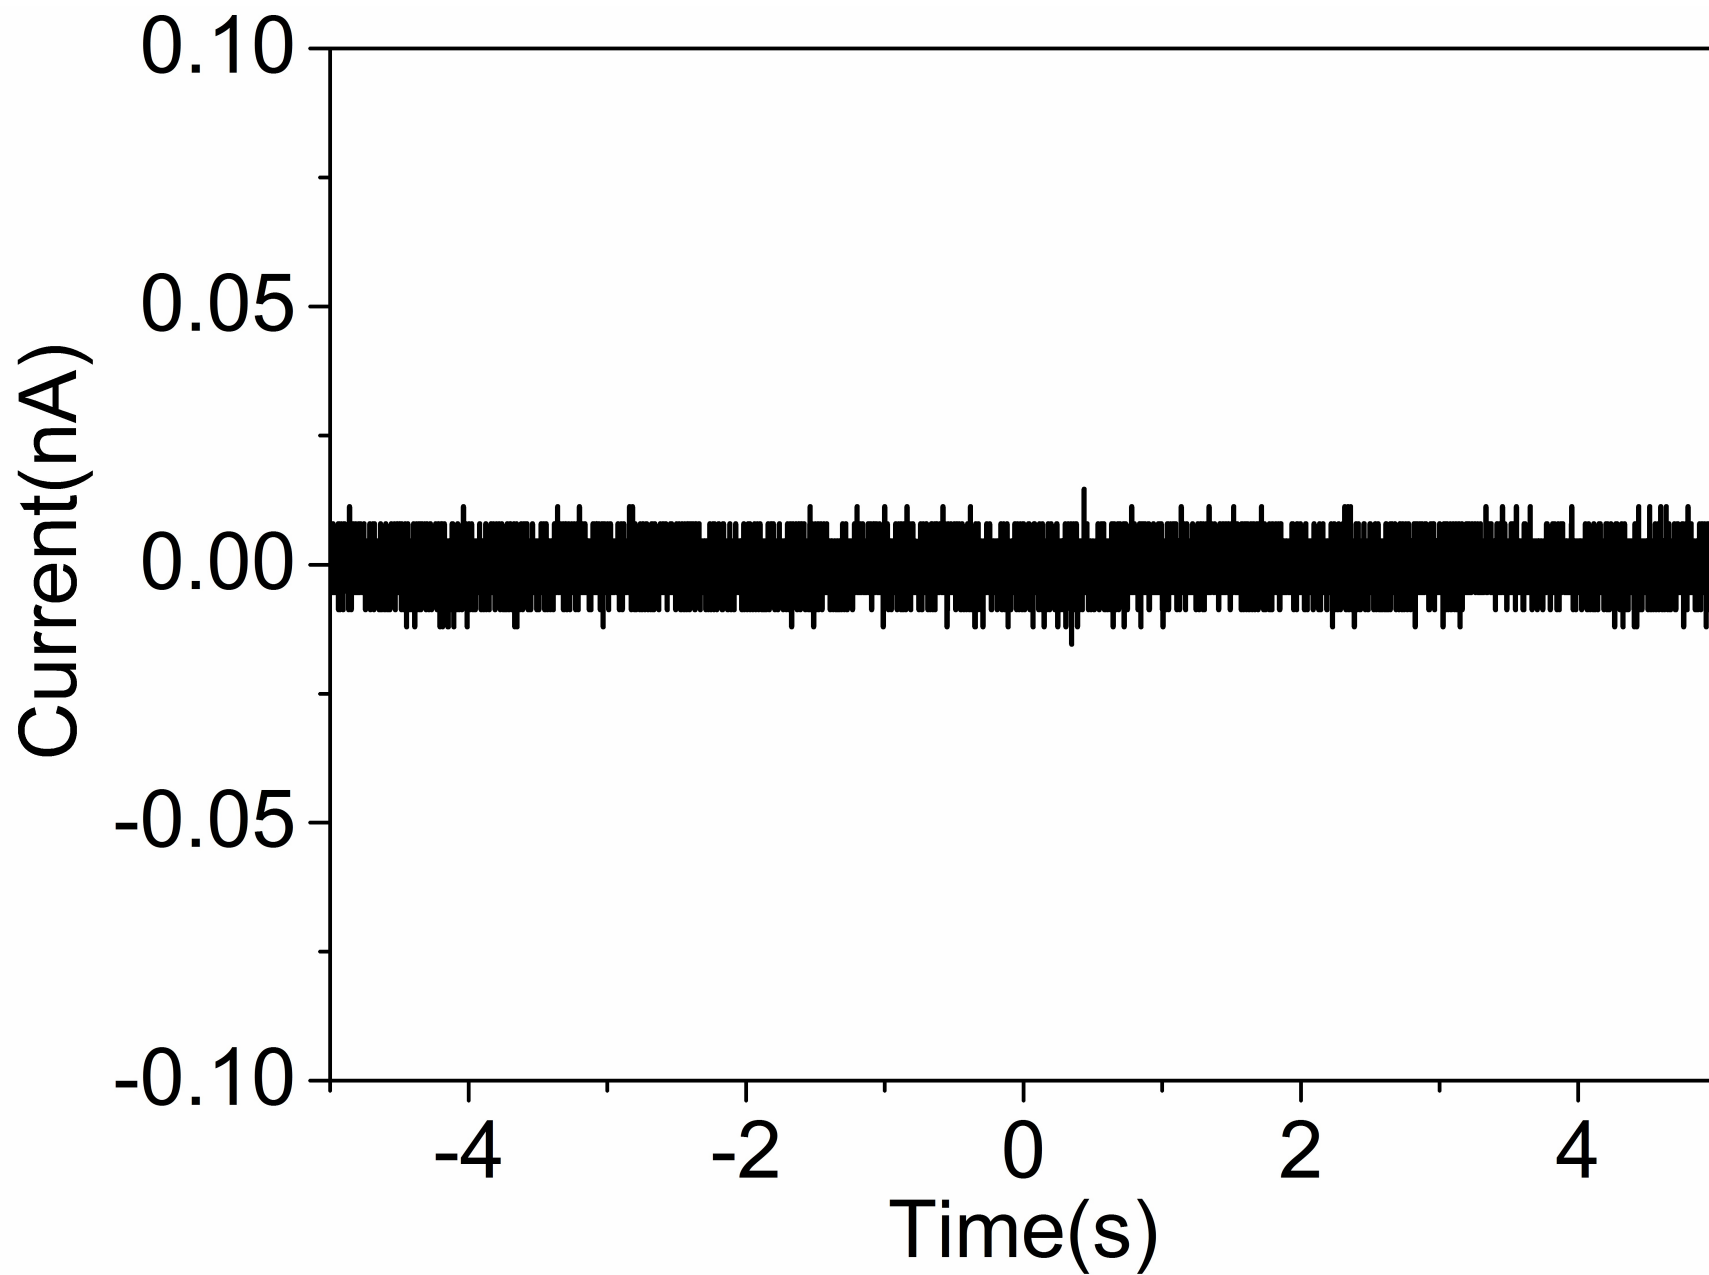

Supplement: c5nr01509j3.pdf [file c5nr01509j3.pdf]

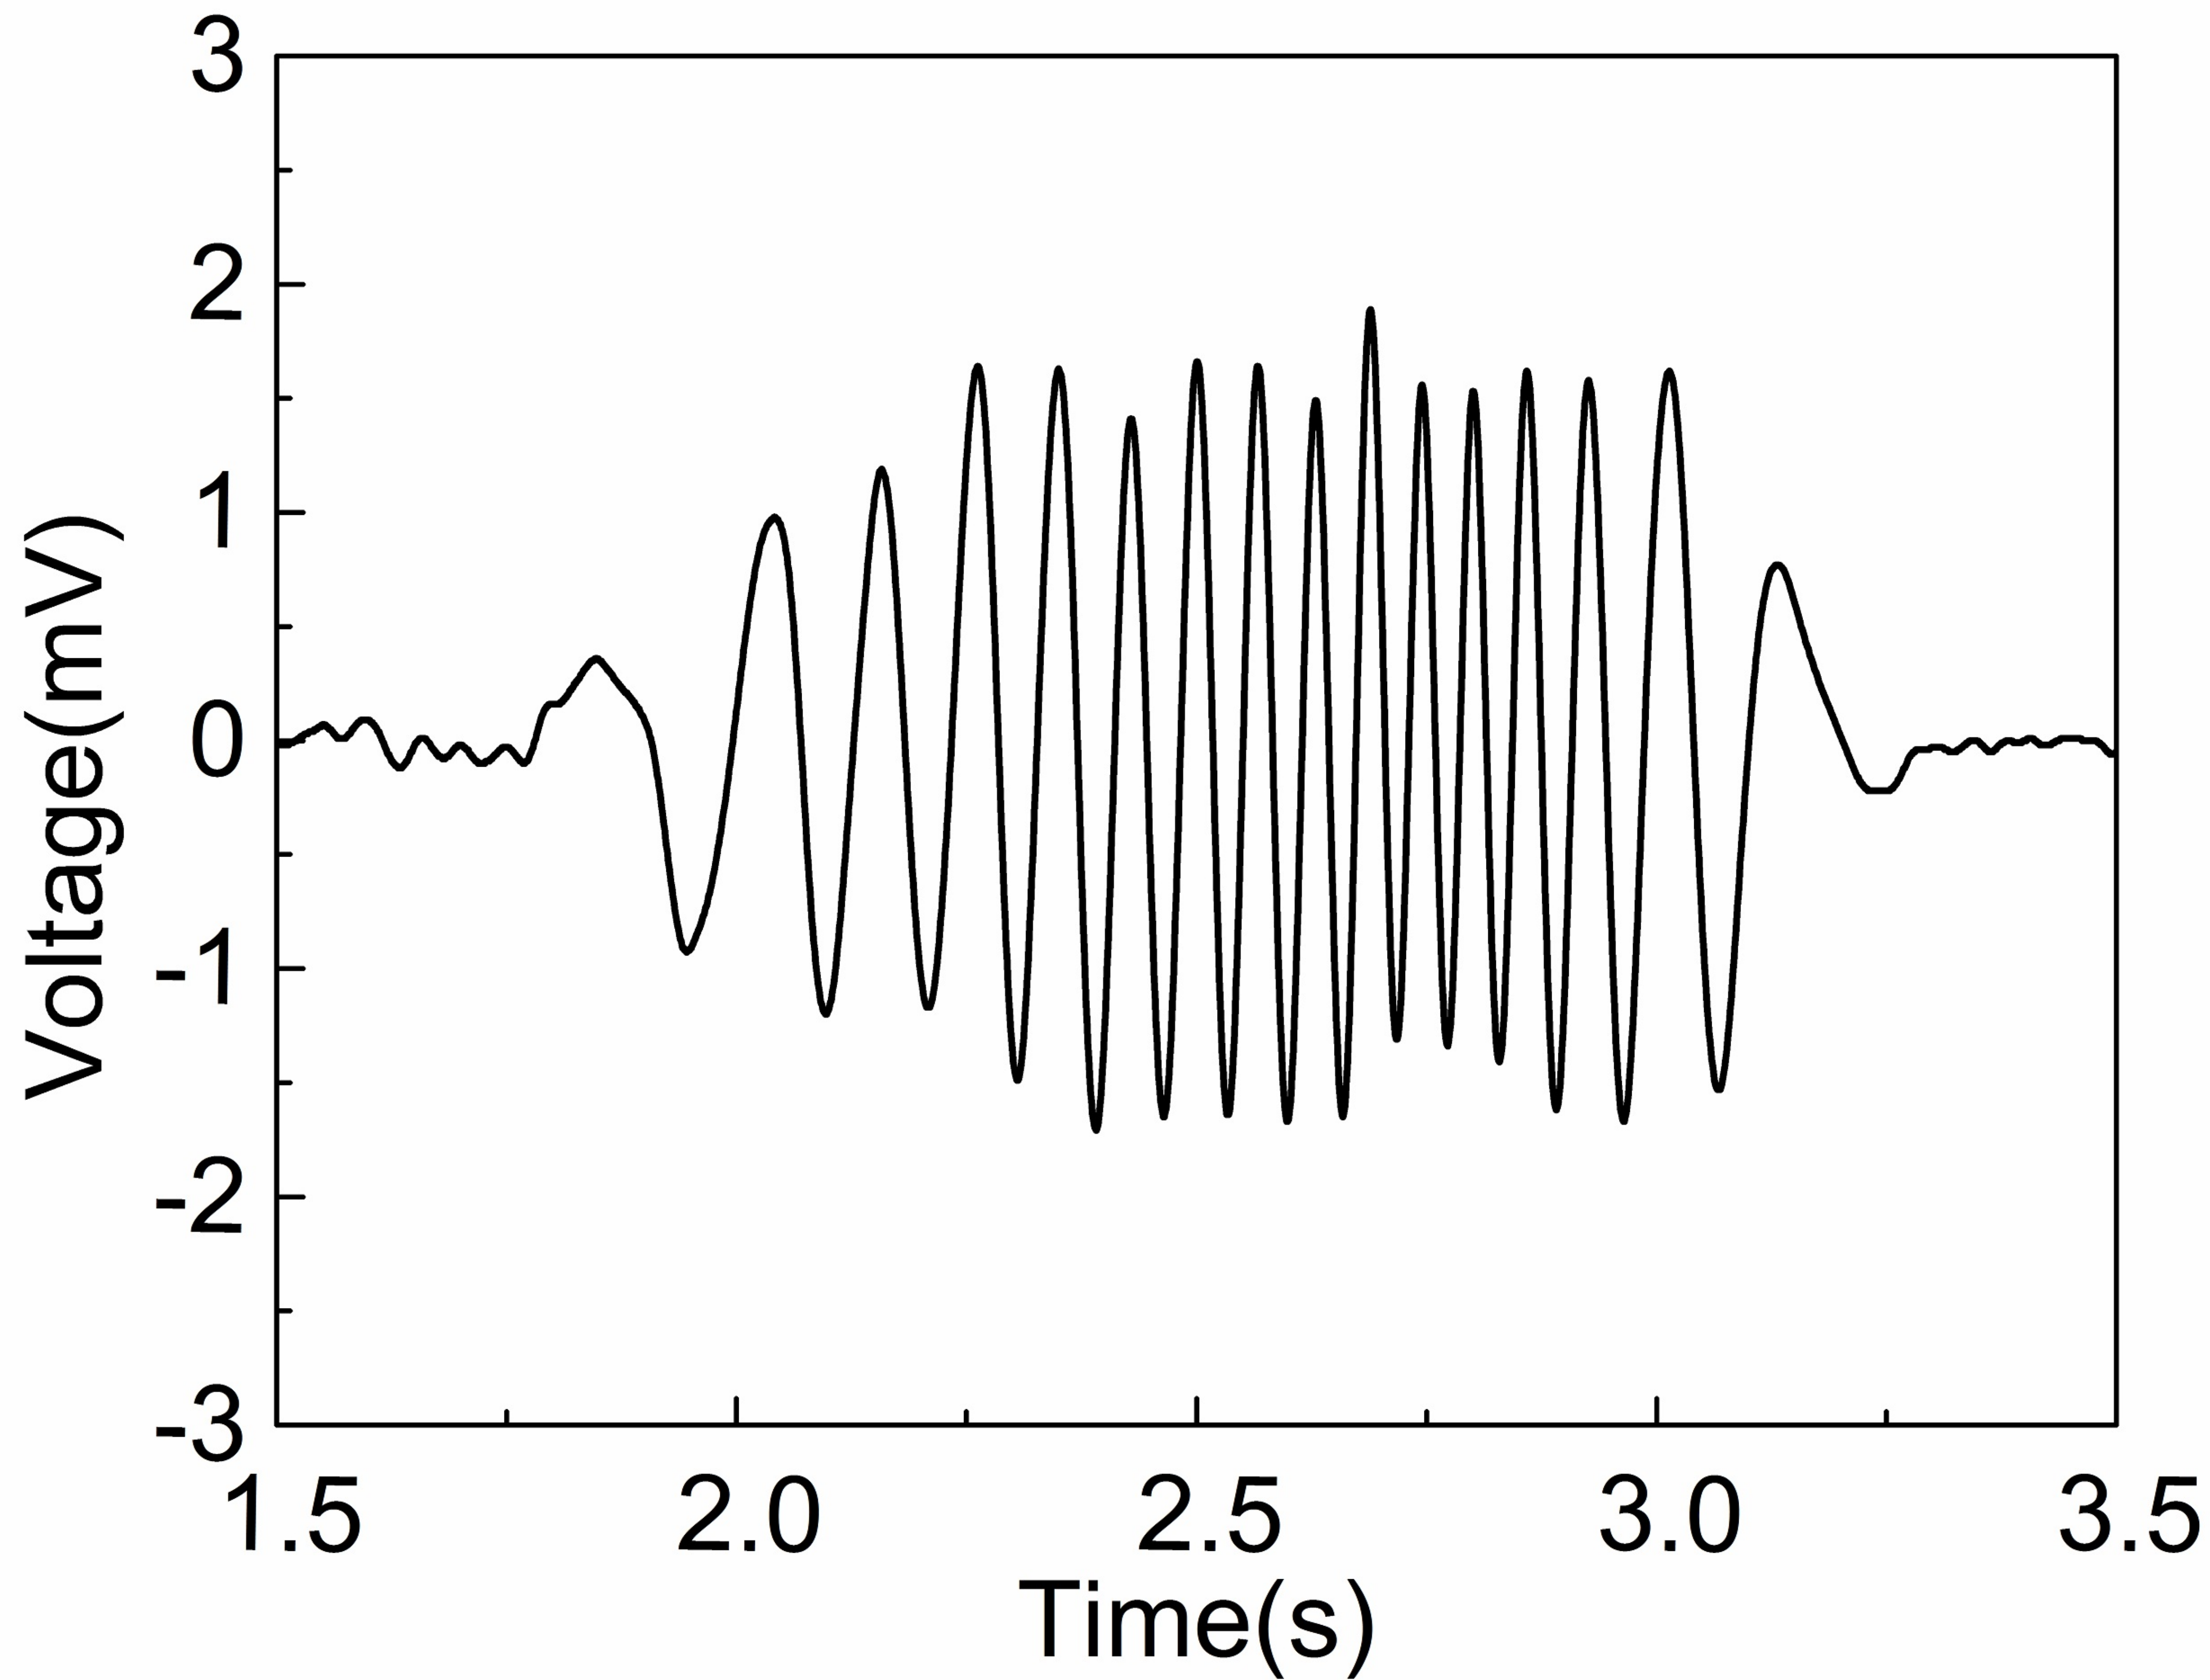

Supplement: c5nr01509j4.pdf [file c5nr01509j4.pdf]
